# Supplementary material for: Covalent triazine framework modified with coordinatively-unsaturated Co or Ni atoms for CO2 electrochemical reduction
Source: Royal Society of Chemistry journal article supplement (doi:10.1039/c8sc00604k), 2018-01-01
Supplement: c8sc00604k1.pdf [file c8sc00604k1.pdf]

## Supporting Information

### Covalent triazine framework modified with coordinatively-unsaturated Co or Ni atoms for CO<sub>2</sub> electrochemical reduction

Panpan Su,<sup>†a</sup> Kazuyuki Iwase,<sup>†b</sup> Takashi Harada,<sup>a</sup> Kazuhide Kamiya,<sup>\*a,c,d</sup> and Shuji Nakanishi<sup>\*a,c</sup>

**Table S1.** XPS elemental analysis results (at. %).

|        | C     | O    | N    | Metal     |
|--------|-------|------|------|-----------|
| CTF    | 86.75 | 5.93 | 6.83 | -         |
| Ni-CTF | 88.29 | 3.95 | 7.06 | 0.14 (Ni) |
| Co-CTF | 89.47 | 3.09 | 6.70 | 0.17 (Co) |
| Cu-CTF | 88.20 | 3.60 | 6.74 | 0.55 (Cu) |

**Table S2.** Metal concentration on M-CTF derived from ICP-OES (at. %).

|        | Metal     |
|--------|-----------|
| Ni-CTF | 0.17 (Ni) |
| Co-CTF | 0.13 (Co) |
| Cu-CTF | 0.38(Cu)  |

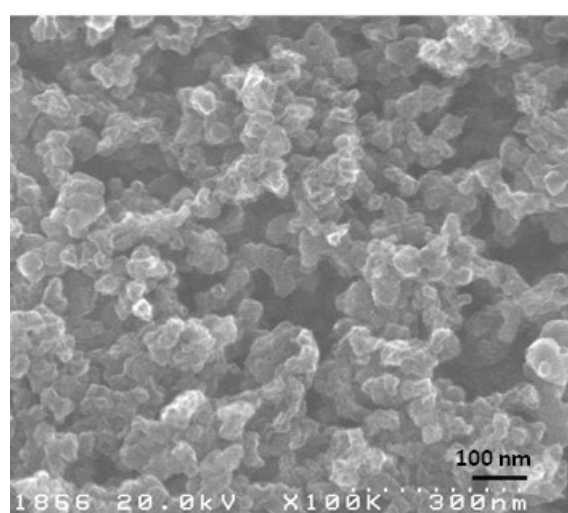

**Fig. S1.** Representative SEM image of CTF.

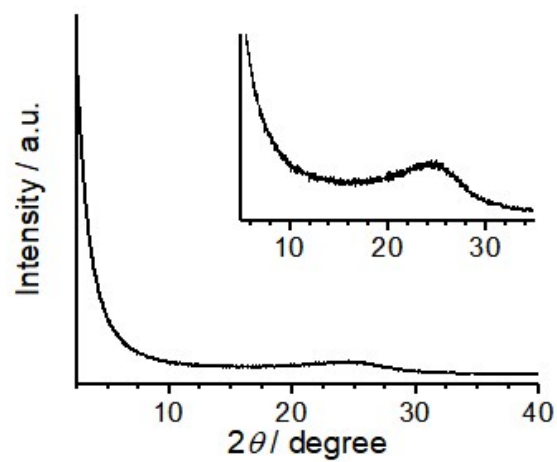

**Fig. S2.** The XRD pattern of CTF. (inset) magnified one.

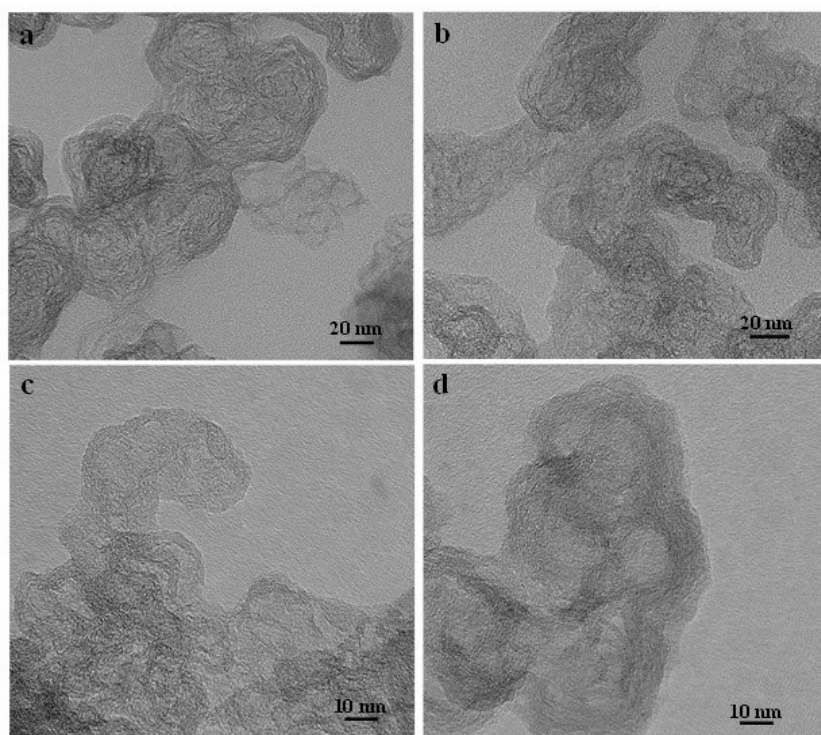

**Fig. S3.** The TEM images of (a) CTF, (b) Ni-CTF, (c) Co-CTF and (d) Cu-CTF.

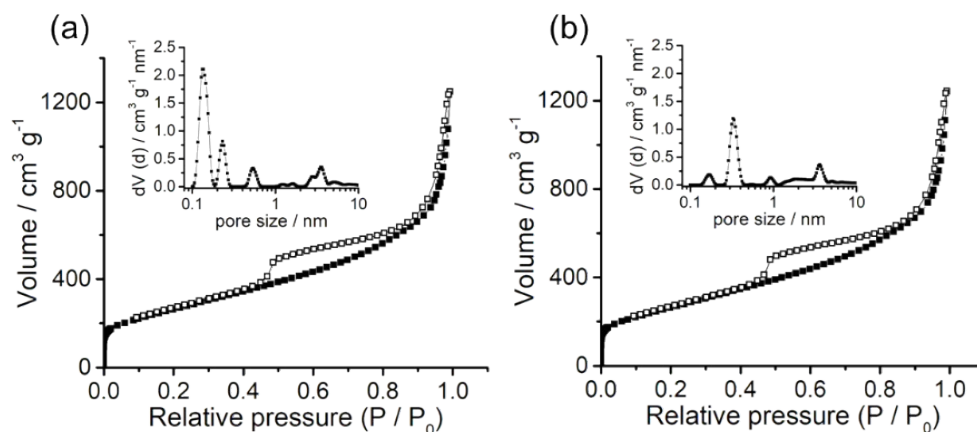

**Fig. S4.** N<sub>2</sub> adsorption-desorption isotherm for CTF (a) and (b) Ni-CTF. The insets show the pore size distributions calculated by nonlocal density functional theory (NL-DFT) method. BET surface area is 937.5 m<sup>2</sup>/g and 933.4 m<sup>2</sup>/g for CTF and Ni-CTF, respectively.

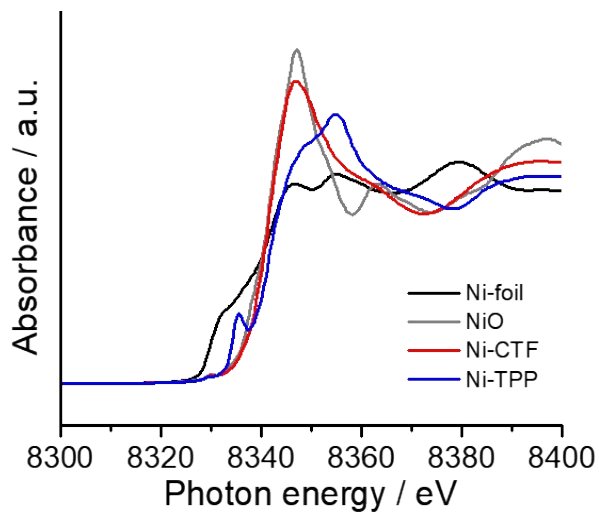

**Fig. S5.** The Ni-K XANES spectra for Ni-CTF, Ni metal, NiO and Ni(II)-TPP.

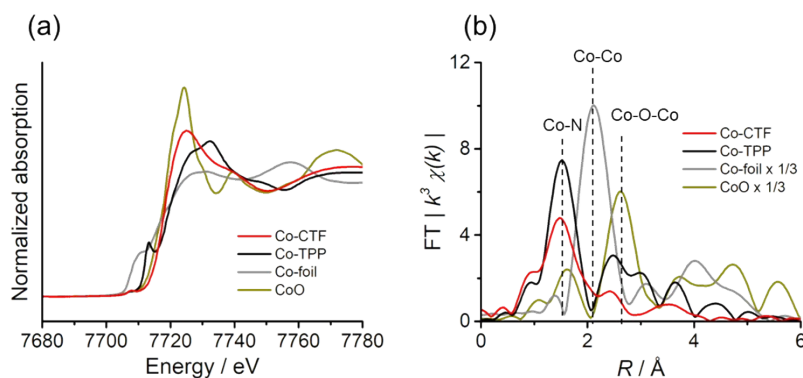

**Fig. S6.** (a) The Co-K XANES spectra for Co-CTF, Co metal, CoO and Co(II)-TPP, and (b)  $k^3$ -weighted Fourier transform EXAFS spectra at the Co K-edge for Co-CTF and Co-TPP.

Figure S6a) shows the Co-K XANES spectra for Co-CTF and the reference samples. The XANES absorption edge corresponding to  $1s \rightarrow 4p$  transitions for Co-CTF located at 7710 eV, which is consistent with that for CoO and Co(II)-TPP. These results indicated that the Co(II) valence state was dominant in Co-CTF. The EXAFS results (Figure S6b) indicate that the Co atoms were individually isolated and each had an unsaturated first coordination sphere containing N atoms in the CTF pores, similar to the results obtained with Ni-CTF and Cu-CTF.

**Table S3.** Results of curve fitting for EXAFS measurement

|        | Bond type | CN  | R               | $\sigma^2 (\times 10^{-3}, \text{\AA})$ | $S_0^2$ |
|--------|-----------|-----|-----------------|-----------------------------------------|---------|
| Co-TPP | Co-N      | 4   | $1.95 \pm 0.02$ | $3.0 \pm 1.6$                           | 0.99    |
| Co-CTF | Co-N      | 3.2 | $2.00 \pm 0.10$ | $7.0 \pm 4.2$                           | 0.99    |
| Ni-TPP | Ni-N      | 4   | $1.94 \pm 0.03$ | $3.1 \pm 2.1$                           | 1.08    |
| Ni-CTF | Ni-N      | 3.4 | $2.08 \pm 0.05$ | $5.7 \pm 1.5$                           | 1.08    |

R : atomic distance ( $\text{\AA}$ ), CN : coordination number,  $\sigma^2$  : Debye–Waller factor,  $S_0^2$  : Amplitude Reduction Factor.

Curve fitting for the EXAFS spectra was conducted by using ARTEMIS software.<sup>S1</sup>

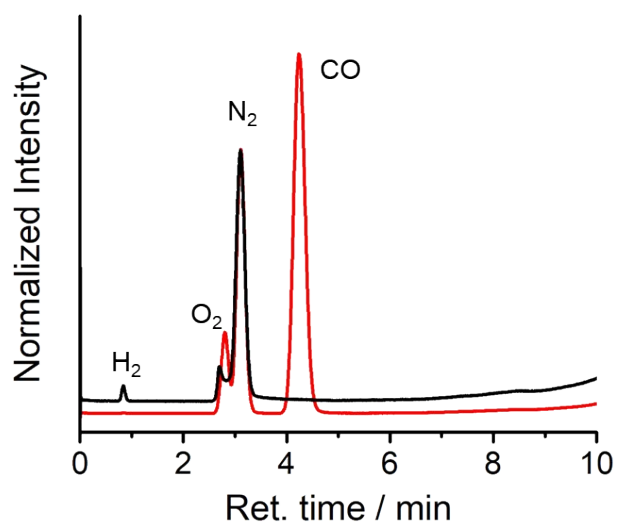

**Fig. S7.** A representative GC-MS result of Ni-CTF catalyst at -0.9V vs RHE after 3C of electrons flow. Red line; Ni-CTF in KHCO<sub>3</sub> solution under CO<sub>2</sub>, Black line; Ni-CTF in phosphate buffer solutions under Ar.

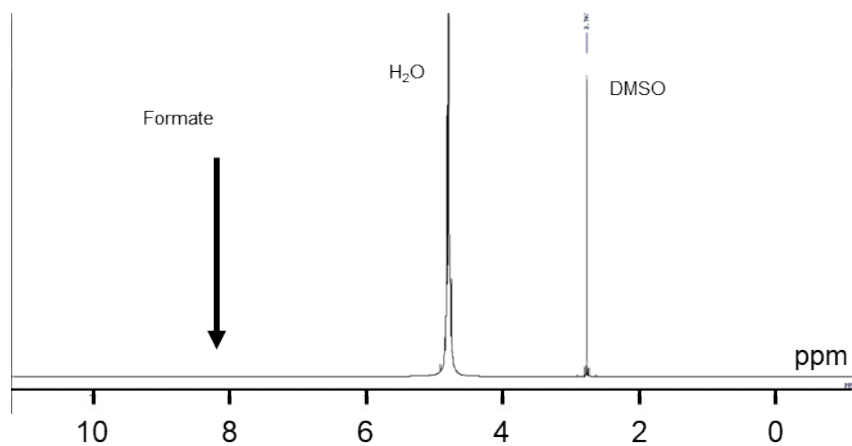

**Fig. S8.** NMR result of Ni-CTF catalyst at -0.8V vs RHE for 1h. DMSO was added as internal standard.

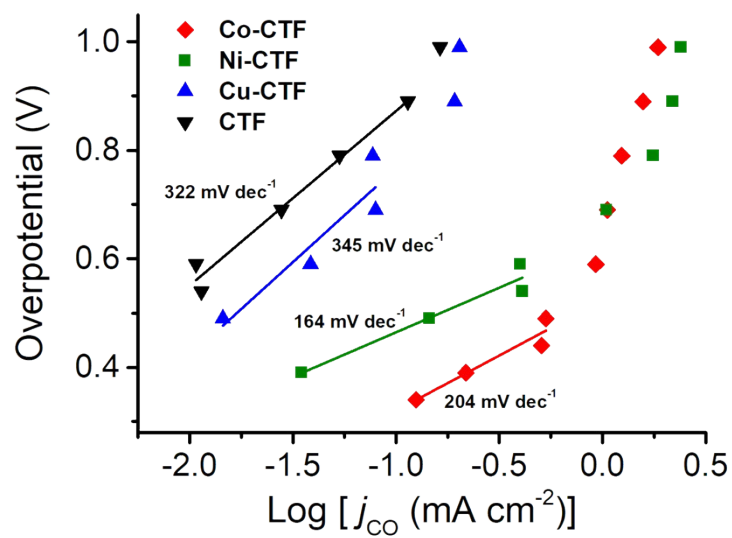

**Fig. S9.** Tafel plots at different overpotentials as a function with the CO partial current density on M-CTF and CTF catalysts.

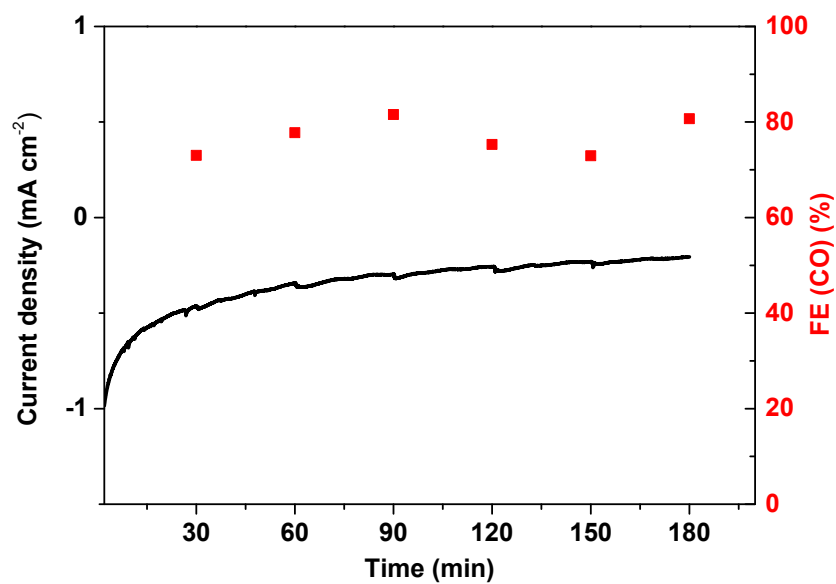

**Fig. S10.** Chronoamperometric and FE of CO results for the Ni-CTF catalyst in CO<sub>2</sub>-saturated KHCO<sub>3</sub> (0.1 M) solution at -0.65 V vs RHE for 3h.

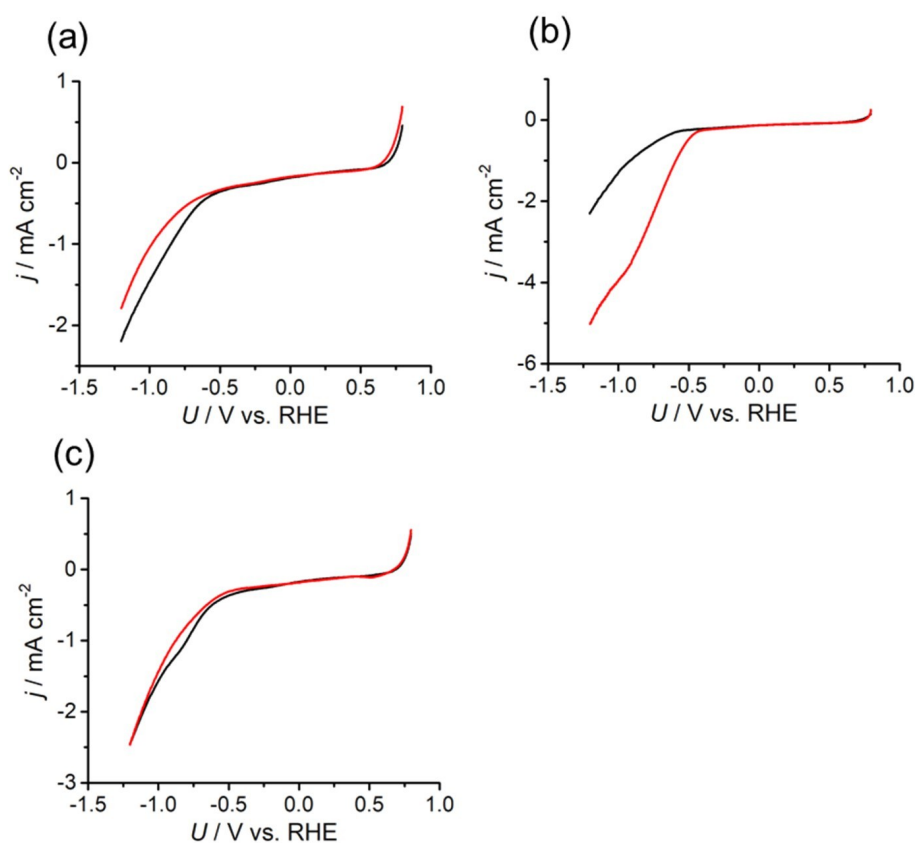

**Fig. S11.** Current density ( $j$ ) versus potential ( $U$ ) curves obtained from (a) Ni-TPP, (b) Co-TPP, and (c) Cu-TPP in a phosphate buffer (saturated with Ar, black line) or a  $\text{KHCO}_3$  electrolyte (saturated with  $\text{CO}_2$ , red line).

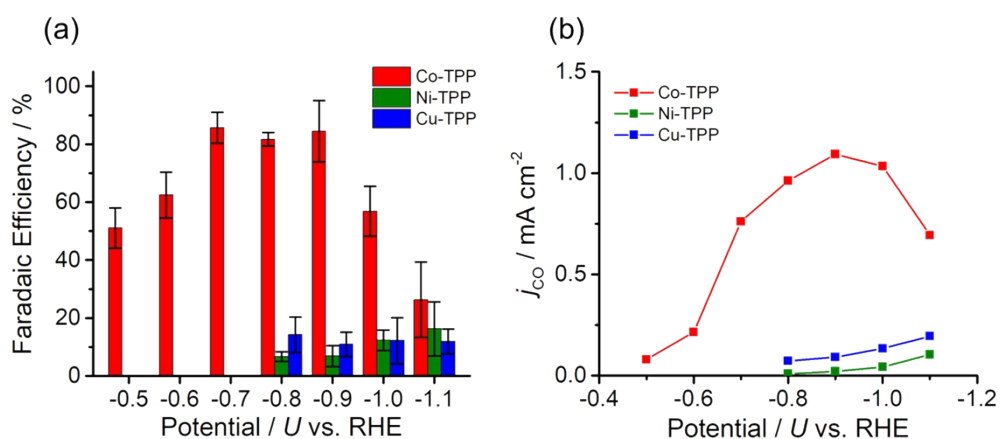

**Fig. S12.** (a) Faradaic efficiency values and (b) partial current densities during CO generation for Co, Ni and Cu-TPP. The error bar represents the standard deviation from three experimental trial.

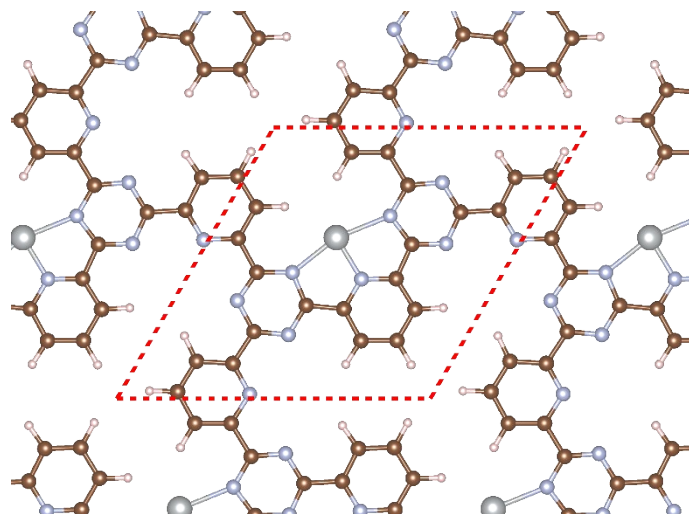

**Fig. S13.** Optimized structures of metal-CTF (Ni-CTF) for the DFT calculation (brown : C, pink : H, blue : N, gray : Ni). The red dashed line shows the unit cell. Almost the same structure was obtained for Cu- and Co-CTF. Red dashed line represents the unit cell. The detail structural parameters were shown in our previous paper.<sup>S2</sup>



**Table S4.** Calculated values for free energy diagrams in Figure 5 in the main paper (@ -0.87V).

|        | CTF / eV |          |          |  | TPP / eV |          |          |
|--------|----------|----------|----------|--|----------|----------|----------|
|        | Co       | Ni       | Cu       |  | Co       | Ni       | Cu       |
| Step 1 | -0.63584 | 0.000259 | 0.35071  |  | -0.2668  | 1.162001 | 1.366827 |
| Step 2 | -2.11152 | -1.28383 | -0.92238 |  | -0.73393 | -0.4277  | -0.56717 |
| Step 3 | -1.39497 | -1.39497 | -1.39497 |  | -1.38032 | -1.38032 | -1.38032 |

**Table S5.**  $U_L(\text{CO}_2)$  values for M-CTF and M-TPP specimens: the potentials at which all elementary steps become exergonic.

| $U_L(\text{CO}_2) / \text{eV}$ | CTF    | TPP   |
|--------------------------------|--------|-------|
| Co                             | -0.23* | -0.60 |
| Ni                             | -0.87  | -2.03 |
| Cu                             | -1.22  | -2.24 |

\*The reaction (3) on Co-CTF is endothermic.

$U_L(\text{CO}_2)$  was calculated as below.<sup>S3</sup> From the reaction (1), we can define  $\Delta G(\text{COOH}^*)$ .

$$\begin{aligned}\Delta G(\text{COOH}^*) &= G[\text{COOH}^*] - G[*] - G[\text{CO}_2] - G[\text{H}^+ + \text{e}^-] \\ &= G[\text{COOH}^*] - G[*] - G[\text{CO}_2] - 0.5G[\text{H}_2] + \text{e}U\end{aligned}$$

When  $\Delta G(\text{COOH}^*)$  is zero, the  $U$  value can be the limiting potential ( $U_L(\text{CO}_2)$ ).

#### Supporting References

- S1 B. Ravel, M. Newville *J. Synchrotron Radiat.* **2005**, 12, 537.
- S2 T. Yoshioka, K. Iwase, S. Nakanishi, K. Hashimoto and K. Kamiya, *J. Phys. Chem. C*, **2016**, 120, 15729.
- S3 (a) H. Mistry, R. Reske, Z. Zeng, Z.-J. Zhao, J. Greeley, P. Strasser and B. R. Cuenya, *J. Am. Chem. Soc.*, **2014**, 136, 16473. (b) H. A. Hansen, J. B. Varley, A. A. Peterson and J. K. Nørskov *J. Phys. Chem. Lett.* **2013**, 4, 388.
